# Supplementary material for: Protein, Amino Acid, Oil, Fatty Acid, Sugar, Anthocyanin, Isoflavone, Lutein, and Antioxidant Variations in Colored Seed-Coated Soybeans
Source: MDPI journal article supplement (doi:10.3390/plants10091765), 2021-08-25
Supplement: s1 [file s1]

*Article*

# **Protein, Amino Acid, Oil, Fatty Acid, Sugar, Anthocyanin, Isoflavone, Lutein, and Antioxidant Variations in Colored Seed-Coated Soybeans**

**Sanjeev Kumar Dhungana, Jeong-Hyun Seo \*, Beom-Kyu Kang, Ji-Hee Park, Jun-Hoi Kim, Jung-Sook Sung, In-Youl Baek, Sang-Ouk Shin, Chan-Sik Jung**

Upland Crop Breeding Research Division, Department of Southern Area Crop Science, National Institute of Crop Science, Rural Development Administration, Miryang 50424, Republic of Korea; sanjeev@korea.kr (S.K.D), next0501@korea.kr (J.-H.S.), hellobk01@korea.kr (B.-K.K.), heeya91@korea.kr (J.-H.P.), itomi123@korea.kr (J.-H.K.), sjs31@korea.kr (J.-S.S.), baekiy@korea.kr (I.-Y.B.), shinso32@korea.kr (S.-O.S.), jung100@korea.kr (C.-S.J.)

\* Correspondence: next0501@korea.kr; Tel.: (+82-55-350-1236)

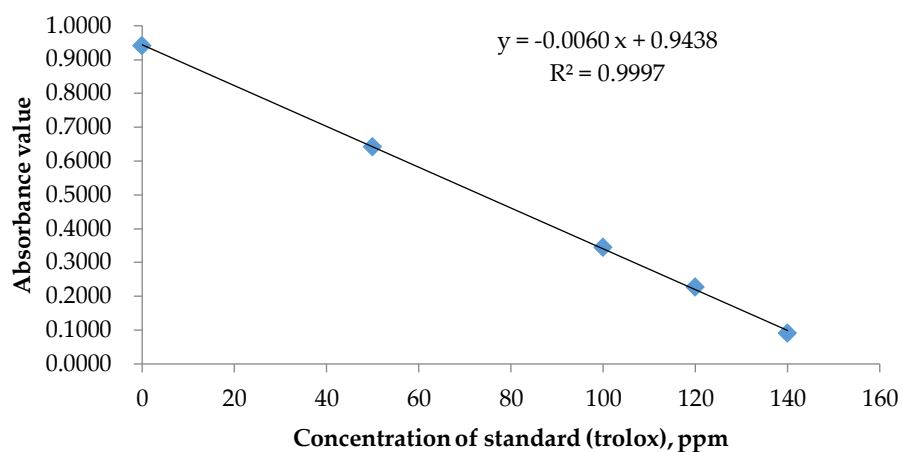

**Supplementary Figure S1.** Standard calibration curve for ABTS (2,2'-azino-bis(3-ethylbenzthiazoline-6-sulphonic acid) radical scavenging assay.

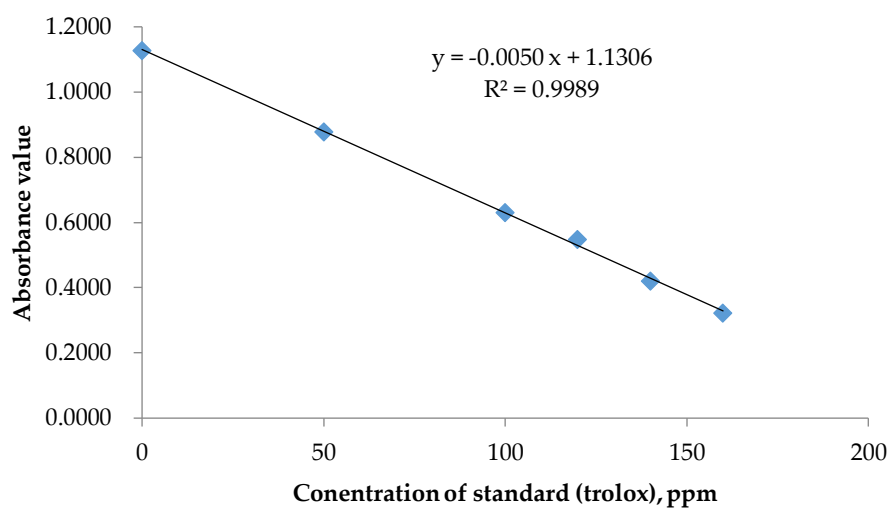

**Supplementary Figure S2.** Standard calibration curve for DPPH (2,2-diphenyl-1-picrylhydrazyl) radical scavenging assay.

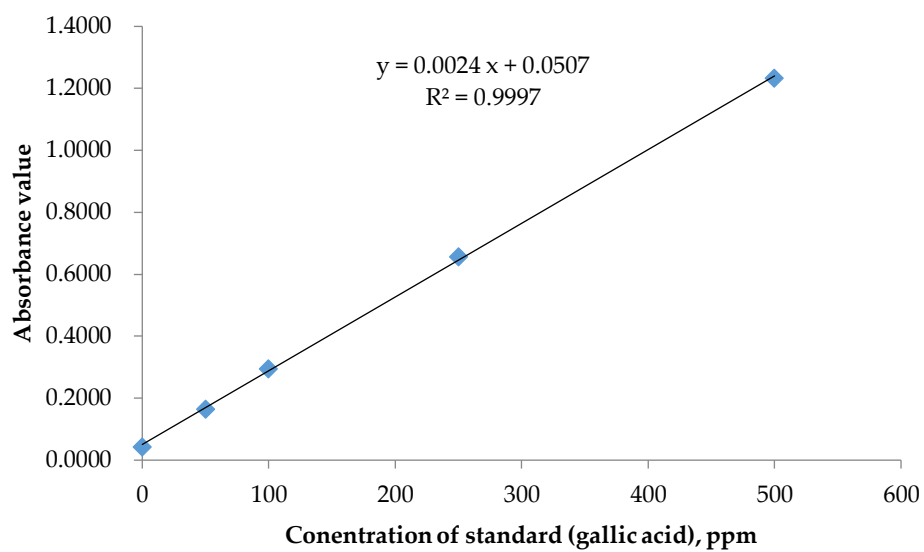

**Supplementary Figure S3.** Standard calibration curve for total polyphenol measurement.

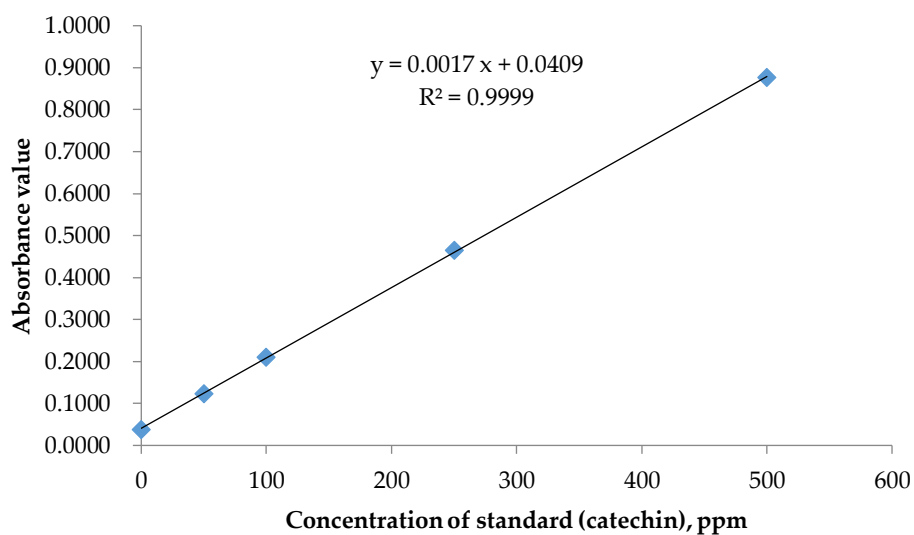

**Supplementary Figure S4.** Standard calibration curve for total flavonoid determination.

**Supplementary Table S1.** Summary of nutrient content and antioxidant potential of 29 soybean genotypes.

| Genotype                | Protein (%) | Oil (%)  | Total sugar (mg/g) | Isoflavone (μg/g) | Anthocyanin (μg/g seed coat) | Lutein (μg/g) | ABTS (mg TE/100 g) | DPPH (mg TE/100 g) | Polyphenol (mg GAE/100 g) | Flavonoid (mg CAE/100 g) |
|-------------------------|-------------|----------|--------------------|-------------------|------------------------------|---------------|--------------------|--------------------|---------------------------|--------------------------|
| Cheongja2 (Bl)          | 41.4 ef     | 16.9 m   | 85.2 e             | 2410.3 e-h        | 17953 b                      | 6.5 g-i       | 411.1 k            | 205.4 m            | 203.2 i-k                 | 54.4 lm                  |
| Cheongja3 (Bl)          | 41.0 f-i    | 18.0 i-k | 78.5 l             | 1868.6 j-l        | 12164 g-j                    | 6.2 g-j       | 425.1 hi           | 235.3 kl           | 195.5 k                   | 63.2 i                   |
| Cheongja4 (Bl)          | 40.1 kl     | 18.7 d-g | 87.2 d             | 1866.2 j-l        | 12499 f-i                    | 11.1 c        | 422.5 i            | 248.2 i            | 206.0 gh                  | 66.0 gh                  |
| Cheongja5 (Bl)          | 40.0 lm     | 18.8 d-f | 79.6 j-l           | 3132.7 ab         | 17547 bc                     | 8.7 d-f       | 500.4 d            | 291.7 ef           | 252.2 c                   | 81.3 d                   |
| Cheongjakong (Bl)       | 39.0 op     | 19.1 b-d | 90.6 bc            | 1965.4 i-l        | 13648 d-h                    | 6.3 g-i       | 421.1 ij           | 237.0 i-k          | 202.1 i-k                 | 64.5 hi                  |
| Cheongyeob1 (Bl)        | 40.6 i-k    | 18.4 f-i | 80.6 i-k           | 1610.6 l          | 13789 d-h                    | 4.4 i-m       | 428.1 h            | 262.9 h            | 207.6 f-h                 | 68.2 g                   |
| Daeheug (Bl)            | 40.8 h-j    | 19.0 c-e | 73.2 o             | 1741 kl           | 16829 b-d                    | 3.7 k-n       | 407.2 k            | 236.0 i-k          | 186.0 l                   | 57.1 k                   |
| Geomjeongkong1 (Bl)     | 41.0 f-i    | 17.8 jk  | 92.3 b             | 1153.7 m          | 3826 l                       | 1.9 n         | 324.1 p            | 155.0 n            | 143.1 q                   | 35.9 o                   |
| Geomjeongkong2 (Bl)     | 39.6 mn     | 19.3 bc  | 82.5 gh            | 2451.5 e-g        | 21856 a                      | 3.8 k-n       | 503.1 d            | 316.2 d            | 240.8 d                   | 76.4 e                   |
| Geomjeongkong3 (Bl)     | 41.2 e-h    | 17.6 kl  | 87.0 d             | 1968.2 i-l        | 17732 bc                     | 5.0 h-l       | 482.7 e            | 295.6 e            | 230.8 e                   | 72.5 f                   |
| Geomjeongkong4 (Bl)     | 38.7 p      | 18.9 c-e | 83.2 fg            | 2860.1 b-d        | 13473 e-h                    | 2.0 n         | 439.8 g            | 232.3 j-l          | 209.7 fg                  | 58.5 jk                  |
| Geomjeongkong5 (Bl)     | 42.7 b      | 18.2 g-j | 75.7 m             | 1784.7 j-l        | 9794 ij                      | 2.5 mn        | 391.4 l            | 221.9 l            | 192.4 k                   | 46.1 n                   |
| Heugmi (Bl)             | 40.3 j-l    | 19.1 b-d | 74.6 m-o           | 1652.4 l          | 11196 h-j                    | 8.0 e-g       | 410.4 k            | 242.7 ij           | 181.9 lm                  | 52.0 m                   |
| Heugsung (Bl)           | 42.0 d      | 16.9 m   | 84.6 ef            | 1676.6 l          | 10144 ij                     | 4.1 j-n       | 416.8 j            | 235.0 jk           | 198.6 i-k                 | 52.5 m                   |
| Ilpumgeomjeong2 (Bl)    | 38.7 p      | 15.6 o   | 97.0 a             | 2581.9 c-f        | 15593 b-f                    | 3.4 l-n       | 470.2 f            | 279.2 fg           | 229.3 e                   | 67.3 g                   |
| Ilpumgeomjeongkong (Bl) | 39.4 n      | 20.2 a   | 73.9 no            | 2508.1 d-f        | 13937 d-h                    | 3.1 l-n       | 424.3 hi           | 230.7 j-l          | 203.3 i-k                 | 52.9 m                   |
| Jungmo3009 (Bl)         | 40.6 ij     | 16.3 n   | 89.4 c             | 2923.9 bc         | 16666 b-e                    | 9.7 c-e       | 469.8 f            | 270.9 gh           | 240.3 d                   | 74.6 ef                  |
| Jungmo3011 (Bl)         | 41.6 de     | 17.9 i-k | 79.0 kl            | 1025.2 mn         | 14700 c-g                    | 6.6 f-h       | 387.4 l            | 239.0 i-k          | 184.7 l                   | 67.0 g                   |
| Seonheukkong (Bl)       | 39.6 mn     | 19.5 b   | 75.5 mn            | 1011.1 mn         | 11259 h-j                    | 3.1 l-n       | 381.4 m            | 227.6 kl           | 172.5 no                  | 57.1 k                   |
| Seoritae (Bl)           | 42.5 b      | 17.3 lm  | 81.3 h-j           | 2080.6 h-k        | 6470 kl                      | 9.4 c-e       | 417.2 j            | 232.3 j-l          | 213.8 f                   | 67.3 g                   |
| Socheong (Bl)           | 39.4 no     | 16.9 m   | 79.8 j-l           | 3394.3 a          | 14602 c-g                    | 14.8 a        | 552.1 b            | 335.4 c            | 279.4 b                   | 94.3 c                   |
| Socheong2 (Bl)          | 40.9 g-i    | 17.3 lm  | 70.2 p             | 2742.3 c-e        | 16013 b-e                    | 13.5 ab       | 818.8 a            | 579.7 a            | 385.8 a                   | 208.5 a                  |
| Socheongja (Bl)         | 41.3 e-g    | 14.5 p   | 74.8 m-o           | 2116.7 g-j        | 15173 b-g                    | 10.5 cd       | 544.7 c            | 363.0 b            | 280.6 b                   | 109.1 b                  |
| Taecheong (Bl)          | 42.5 bc     | 18.2 h-j | 83.0 f-h           | 709.5 n           | 15507 b-f                    | 11.4 bc       | 389.1 l            | 231.9 j-l          | 175.7 mn                  | 56.8 kl                  |
| Tawonkong (Bl)          | 42.1 cd     | 15.4 o   | 63.5 r             | 955.2 mn          | 5979 kl                      | 4.0 k-n       | 425.9 hi           | 242.0 ij           | 197.7 jk                  | 67.2 g                   |
| Wonheug (Bl)            | 43.3 a      | 13.9 q   | 68.1 q             | 1785 j-l          | 9024 jk                      | 6.3 g-i       | 423.1 hi           | 230.8 j-l          | 204.3 g-i                 | 59.8 j                   |
| Jinyul (Br)             | 41.0 f-i    | 17.9 i-k | 82.3 g-i           | 971.8 mn          | ND                           | 3.6 k-n       | 274.9 q            | 112.0 o            | 123.0 r                   | 24.3 p                   |
| Chungdul (Gr)           | 41.1 f-h    | 18.6 e-h | 78.4 l             | 2622.6 c-f        | ND                           | 5.6 h-k       | 355.0 n            | 124.3 o            | 167.7 op                  | 23.4 p                   |
| Jungmo3005 (Gr)         | 41.9 d      | 17.9 i-k | 74.1 m-o           | 2285.0 f-i        | ND                           | 5.2 h-l       | 332.8 o            | 96.3 p             | 163.8 p                   | 22.1 p                   |
| LSD (5%)                | 0.45        | 0.47     | 1.76               | 319.70            | 3241                         | 2.16          | 5.28               | 12.57              | 6.35                      | 2.43                     |

Bl, Br, and Gr, after the name of genotypes indicate their seed coat color black, brown, and green, respectively. TE: Trolox equivalent. GAE: gallic acid equivalent. CAE: catechin equivalent. Mean values followed by different letters in the same column indicate significantly different ( $p < 0.05$ ). ND: non-detectable.

**Supplementary Table S2.** Amino acid concentration (mg/g) in the seeds of 29 soybean genotypes.

| Genotype                | Arg         | His         | Ile          | Leu          | Lys          | Met         | Phe          | Thre         | Val          | Ala         | Asp          | Glu          | Ser          | Amm          | Cys         | Gly          | Pro          | Tyr      |
|-------------------------|-------------|-------------|--------------|--------------|--------------|-------------|--------------|--------------|--------------|-------------|--------------|--------------|--------------|--------------|-------------|--------------|--------------|----------|
| Cheongja2 (Bl)          | 24.6<br>n   | 9.1 k       | 15.4 f-<br>h | 27.0 i-<br>k | 21.6 l<br>m  | 3.1<br>m    | 17.6<br>gh   | 13.2 g-<br>i | 16.2 j-l     | 14.6 h      | 37.8<br>kl   | 68.6 h-<br>j | 17.7 i-<br>l | 21.0 ij      | 1.4 g-<br>i | 14.7<br>h-j  | 16.9<br>e-i  | 10.8 gh  |
| Cheongja3 (Bl)          | 26.7<br>g-i | 9.1 jk      | 14.9 k       | 26.9 j-l     | 21.7<br>kl   | 3.5 k       | 17.3 h-<br>k | 12.8 i-<br>k | 15.7<br>mn   | 14.5<br>hi  | 38.2 i-<br>k | 67.0 kl      | 17.6 j-<br>l | 21.7 ef      | 1.1 i       | 14.3<br>kl   | 16.7 f-<br>i | 10.5 jk  |
| Cheongja4 (Bl)          | 28.7 e      | 8.9 l       | 14.4 n       | 25.5 q       | 20.9 o       | 3.6 h       | 16.7 n       | 12.3 l       | 15.3 o       | 14.1 j      | 37.1<br>lm   | 64.9<br>mn   | 16.8 n       | 22.6 b       | 1.3 hi      | 13.8<br>mn   | 16.1<br>h-j  | 10.0 n   |
| Cheongja5 (Bl)          | 27.0<br>h   | 8.9 l       | 15.0<br>jk   | 26.4<br>mn   | 21.8 j-<br>l | 3.9<br>de   | 17.1<br>lm   | 12.8 jk      | 15.8<br>mn   | 14.2 ij     | 38.7<br>h-j  | 67.5 jk      | 18.0<br>g-j  | 19.9 n       | 1.9<br>d-i  | 14.1<br>lm   | 16.6 f-<br>i | 10.5 j-m |
| Cheongjakong (Bl)       | 24.2 o      | 8.8 m       | 14.4 n       | 25.8<br>pq   | 20.5 p       | 4.0<br>cd   | 17.1 j-l     | 13.1 g-<br>i | 15.7 n       | 14.4<br>hi  | 38.1<br>jk   | 67.0 kl      | 18.0<br>h-j  | 18.8 p       | 2.7 a-<br>e | 14.5<br>jk   | 17.8<br>b-e  | 10.3 lm  |
| Cheongyeob1 (Bl)        | 23.4<br>p   | 8.5 n       | 14.6<br>mn   | 25.5 q       | 20.5 p       | 3.5 i-<br>k | 16.7 n       | 12.3 l       | 15.2 o       | 13.7 k      | 35.7 n       | 63.5 n       | 16.5 n       | 18.9 p       | 1.1 i       | 13.7 n       | 15.1 j       | 10.1 n   |
| Daeheug (Bl)            | 26.6<br>h-j | 9.2<br>gh   | 15.7<br>de   | 27.7<br>d-g  | 21.9<br>h-k  | 3.5 i-<br>k | 18.4 c       | 14.1<br>bc   | 16.8 c-<br>f | 15.7<br>c-e | 40.3<br>de   | 72.6 b       | 19.1<br>bc   | 21.9<br>de   | 2.4 b-<br>f | 15.6<br>cd   | 17.1 c-<br>h | 11.1 d-f |
| Geomjeongkong1 (Bl)     | 28.4 e      | 9.6<br>bc   | 15.6<br>d-f  | 27.8<br>de   | 22.3<br>ef   | 3.8 ef      | 18.4<br>cd   | 14.0 b-<br>d | 17.0 b-<br>e | 15.9 c      | 41.3 c       | 72.1<br>bc   | 18.9<br>b-d  | 22.1<br>cd   | 2.4 b-<br>g | 15.7<br>bc   | 17.8<br>b-e  | 10.9 fg  |
| Geomjeongkong2 (Bl)     | 26.6 ij     | 9.2 f-<br>h | 15.3<br>hi   | 27.2 h-<br>j | 22.0 f-<br>i | 3.8<br>fg   | 17.7 g       | 13.8 c-<br>e | 16.6 f-<br>i | 15.8 c      | 41.0<br>cd   | 70.8 c-<br>f | 18.8<br>b-e  | 21.2 h-<br>j | 2.3 c-<br>h | 15.3<br>ef   | 17.6<br>b-f  | 11.0 d-f |
| Geomjeongkong3 (Bl)     | 27.0<br>fg  | 9.5<br>de   | 15.4 f-<br>h | 27.4 f-<br>h | 22.2<br>e-g  | 3.6<br>hi   | 18.0 ef      | 13.6 ef      | 16.7 e-<br>h | 15.8 c      | 40.0<br>ef   | 70.3<br>d-g  | 18.4<br>e-g  | 21.4 f-<br>h | 1.8 e-<br>i | 15.5<br>c-e  | 17.3 c-<br>g | 10.9 fg  |
| Geomjeongkong4 (Bl)     | 24.5<br>no  | 9.1 i-<br>k | 15.1<br>jk   | 26.8 kl      | 21.4<br>mn   | 3.5 jk      | 17.6<br>gh   | 13.3 fg      | 16.4 h-<br>j | 15.0 g      | 38.1<br>jk   | 66.3 k-<br>m | 18.1<br>g-i  | 19.7 n       | 2.8 a-<br>d | 14.7 ij      | 17.0<br>d-i  | 10.7 hi  |
| Geomjeongkong5 (Bl)     | 27.3 f      | 9.5<br>cd   | 15.6<br>d-f  | 27.7<br>d-g  | 22.0<br>g-k  | 3.8<br>fg   | 18.1<br>de   | 13.7<br>de   | 16.8 c-<br>g | 15.8 c      | 41.4 c       | 71.2 b-<br>f | 18.7<br>c-f  | 22.2 c       | 2.4 b-<br>g | 15.6<br>c-e  | 18.0<br>a-d  | 11.1 de  |
| Heugmi (Bl)             | 24.4<br>no  | 8.7 m       | 15.3<br>g-i  | 26.8 k-<br>m | 21.4<br>mn   | 3.6 h       | 17.2 i-l     | 13.2<br>gh   | 16.3 i-<br>k | 14.5 h      | 38.2 i-<br>k | 65.8<br>lm   | 17.5<br>kl   | 20.4<br>lm   | 1.6 f-<br>i | 14.6 i-<br>k | 17.2 c-<br>g | 10.5 jk  |
| Heugsung (Bl)           | 26.7<br>g-i | 9.2 hi      | 15.2 ij      | 26.9 j-l     | 21.4<br>mn   | 3.8<br>fg   | 17.7 fg      | 13.2<br>gh   | 16.6 f-<br>i | 15.0 g      | 39.2 f-<br>h | 70.2 e-<br>g | 18.1<br>g-i  | 21.0 ij      | 2.7 a-<br>e | 15.0 f-<br>h | 17.6<br>b-f  | 10.4 j-m |
| Ilpumgeomjeong2 (Bl)    | 25.5 l      | 9.1 h-<br>k | 15.9 c       | 27.9<br>de   | 22.0<br>g-j  | 4.0<br>cd   | 18.6 c       | 13.7<br>de   | 17.1<br>bc   | 15.7<br>cd  | 39.2<br>gh   | 68.7 g-<br>j | 18.3 f-<br>h | 20.7 kl      | 3.0 a-<br>c | 15.5<br>c-e  | 17.0<br>d-h  | 11.2 d   |
| Ilpumgeomjeongkong (Bl) | 26.4<br>jk  | 9.4 e-<br>g | 15.8<br>cd   | 27.6 e-<br>h | 22.1<br>e-h  | 4.0<br>cd   | 18.1 e       | 14.1 b       | 16.8 c-<br>f | 15.8 c      | 39.8<br>e-g  | 69.9 f-<br>h | 18.6<br>d-f  | 20.9 jk      | 3.0 a-<br>c | 15.7<br>bc   | 16.5<br>g-i  | 11.5 c   |
| Jungmo3009 (Bl)         | 25.3 l      | 9.1 i-<br>k | 15.4 f-<br>h | 27.3 g-<br>i | 21.9<br>h-l  | 3.7 g       | 17.8 fg      | 14.0 b-<br>d | 16.6 f-<br>i | 15.4<br>ef  | 39.0<br>g-i  | 69.1 g-<br>i | 18.6<br>c-f  | 20.4<br>lm   | 2.4 b-<br>g | 15.5<br>c-e  | 16.6 f-<br>i | 11.0 ef  |

|                   |             |             |             |              |              |             |              |              |              |             |             |              |             |              |             |             |              |          |
|-------------------|-------------|-------------|-------------|--------------|--------------|-------------|--------------|--------------|--------------|-------------|-------------|--------------|-------------|--------------|-------------|-------------|--------------|----------|
| Jungmo3011 (Bl)   | 31.5 c      | 9.7 b       | 15.6<br>e-g | 27.7<br>d-f  | 22.7 c       | 3.9<br>de   | 17.8 fg      | 13.8 c-<br>e | 16.5 g-<br>i | 15.8 c      | 41.8<br>bc  | 72.4 b       | 19.2 b      | 21.4 f-<br>h | 2.9 a-<br>c | 15.5<br>c-e | 17.0<br>d-h  | 11.1 de  |
| Seonheukkong (Bl) | 26.8<br>g-i | 9.4 ef      | 15.7<br>de  | 27.8<br>d-g  | 22.7 c       | 3.6<br>hi   | 18.1e        | 13.9 b-<br>e | 16.8<br>d-g  | 15.5<br>d-f | 39.9<br>e-g | 69.2 g-<br>i | 18.7<br>b-e | 20.6 kl      | 2.7 a-<br>e | 15.3<br>d-f | 16.9<br>e-i  | 11.2 de  |
| Seoritae (Bl)     | 34.5 a      | 8.8 m       | 14.7<br>lm  | 25.8<br>pq   | 21.7<br>kl   | 3.8<br>fg   | 17.1 j-l     | 13.1 g-<br>j | 15.8<br>mn   | 14.5<br>hi  | 38.5<br>h-k | 67.8 i-<br>k | 17.9<br>h-k | 22.7 b       | 3.3 a-<br>c | 14.3<br>kl  | 17.4 c-<br>g | 10.4 k-m |
| Socheong (Bl)     | 23.2<br>p   | 8.8<br>lm   | 14.9 k      | 26.6 l-<br>n | 21.4<br>mn   | 4.1 b       | 17.4 h-<br>j | 13.3 fg      | 16.0 k-<br>m | 15.0 g      | 37.2<br>lm  | 65.0<br>mn   | 18.0<br>h-j | 21.6 ef      | 2.6 a-<br>f | 14.6 ij     | 17.2 c-<br>g | 10.5 j-l |
| Socheong2 (Bl)    | 23.3<br>p   | 9.1 k       | 14.9<br>kl  | 26.4<br>m-o  | 21.9 i-<br>l | 3.6<br>h-j  | 17.0<br>lm   | 14.0 b-<br>d | 16.0 l-<br>n | 15.3<br>fg  | 37.6<br>kl  | 65.3 m       | 18.6<br>d-f | 20.3 m       | 2.6 a-<br>e | 15.1<br>fg  | 16.0 ij      | 10.6 ij  |
| Socheongja (Bl)   | 25.0<br>m   | 8.5 n       | 14.4 n      | 26.0<br>op   | 21.2 n       | 3.5 i-<br>k | 16.8 m       | 12.9 h-<br>k | 15.8<br>mn   | 14.4<br>h-j | 37.2<br>lm  | 63.4 n       | 17.3<br>lm  | 19.3 o       | 2.9 a-<br>d | 14.1 l      | 16.5 f-<br>i | 10.3 m   |
| Taecheong (Bl)    | 33.1 b      | 9.2 h-<br>j | 15.1<br>jk  | 26.4<br>no   | 22.0<br>g-k  | 3.6<br>hi   | 17.1 kl      | 13.3 fg      | 16.4 h-<br>j | 15.1 g      | 42.6<br>ab  | 71.9 b-<br>d | 18.8<br>b-e | 23.6 a       | 3.6 a       | 14.8<br>g-i | 18.1<br>a-c  | 10.5 jk  |
| Tawonkong (Bl)    | 28.7 e      | 10.1<br>a   | 16.9 a      | 30.1 a       | 24.3 a       | 4.3 a       | 19.8 a       | 14.8 a       | 17.8 a       | 16.6 a      | 43.5 a      | 76.2 a       | 20.2 a      | 23.5 a       | 3.4<br>ab   | 16.6 a      | 18.4<br>ab   | 12.3 a   |
| Wonheug (Bl)      | 30.7<br>d   | 10.0<br>a   | 16.4 b      | 29.6 b       | 23.6 b       | 4.1 b       | 19.3 b       | 14.7 a       | 17.6 a       | 16.3 b      | 43.0 a      | 75.6 a       | 20.2 a      | 22.6 b       | 2.8 a-<br>d | 16.7 a      | 18.9 a       | 12.3 a   |
| Jinyul (Br)       | 27.4 f      | 9.6<br>bc   | 15.8<br>c-e | 28.0 d<br>de | 22.4<br>lm   | 3.1<br>lm   | 18.6 c       | 14.0 b-<br>d | 17.2 b       | 15.9 c      | 40.2<br>de  | 71.7 b-<br>e | 18.7<br>b-e | 20.9 jk      | 3.4<br>ab   | 16.0 b      | 16.8<br>e-i  | 11.5 c   |
| Chungdu1 (Gr)     | 24.1 o      | 9.1 i-<br>k | 14.9<br>kl  | 26.6 l-<br>n | 21.3 n       | 3.2 l       | 17.4 hi      | 12.6 kl      | 15.7 n       | 14.3<br>h-j | 36.4<br>mn  | 65.9<br>lm   | 16.9<br>mn  | 21.6 e-<br>g | 1.0 i       | 14.0<br>lm  | 16.9<br>e-i  | 10.4 k-m |
| Jungmo3005 (Gr)   | 26.1 k      | 9.7 b       | 15.8<br>c-e | 28.5 c<br>cd | 22.6<br>bc   | 4.0<br>bc   | 18.4 c       | 14.1<br>bc   | 17.1 b-<br>d | 15.8 c      | 41.3 c      | 71.9 b-<br>d | 19.0<br>b-d | 21.3 g-<br>i | 3.2 a-<br>c | 15.7<br>bc  | 16.7 f-<br>h | 11.8 b   |
| LSD (5%)          | 0.35        | 0.12        | 0.23        | 0.39         | 0.27         | 0.08        | 0.26         | 0.34         | 0.32         | 0.29        | 0.87        | 1.59         | 0.44        | 0.32         | 1.02        | 0.34        | 1.06         | 0.16     |

Arg: arginine, His: histidine, Ile: isoleucine, Leu: leucine, Lys: lysine, Met: methionine, Phe: phenylalanine, Thre: threonine, Val: valine, Ala: alanine, Asp: asparagine, Glu: glutamine, Ser: serine, Amm: ammonium, Cys: cysteine, Gly: glycine, Pro: proline, Tyr: tyrosine. Bl, Br, and Gr, in the parentheses, after the name of genotypes indicate their seed coat color black, brown, and green, respectively. Mean values followed by different letters in the same column indicate significantly different at  $p < 0.05$  ( $n = 2$ ).

**Supplementary Table S3.** Fatty acid content (% of oil content) in the seeds of 29 soybean genotypes.

| Genotype                | Palmitic | Stearic | Oleic    | Linoleic | Linolenic |
|-------------------------|----------|---------|----------|----------|-----------|
| Cheongja2 (Bl)          | 10.5 k-m | 3.4 d-g | 23.1 g-i | 54.4 f-i | 8.6 e     |
| Cheongja3 (Bl)          | 10.1 no  | 3.2 g-j | 20.5 k-m | 58.2 ab  | 8.0 g     |
| Cheongja4 (Bl)          | 10.9 f-j | 3.5 de  | 25.7 de  | 52.7 jk  | 7.2 l     |
| Cheongja5 (Bl)          | 11.8 c   | 3.4 d-h | 16.5 no  | 58.6 ab  | 9.7 b     |
| Cheongjakong (Bl)       | 10.2 no  | 3.2 h-k | 25.5 d-f | 54.0 g-j | 7.2 l     |
| Cheongyeob1 (Bl)        | 12.9 a   | 3.5 d   | 22.3 g-k | 53.6 h-k | 7.7 h     |
| Daeheug (Bl)            | 12.4 b   | 3.2 g-j | 28.4 c   | 50.2 l   | 5.8 q     |
| Geomjeongkong1 (Bl)     | 10.7 j-l | 3.3 d-i | 29.7 c   | 49.6 lm  | 6.7 n     |
| Geomjeongkong2 (Bl)     | 10.7 i-l | 3.4 d-h | 29.4 c   | 49.7 lm  | 6.9 m     |
| Geomjeongkong3 (Bl)     | 10.7 h-j | 3.1 i-l | 21.9 i-k | 55.6 d-g | 8.7 e     |
| Geomjeongkong4 (Bl)     | 11.0 e-h | 3.5 d-f | 23.4 f-i | 54.7 e-h | 7.5 jk    |
| Geomjeongkong5 (Bl)     | 11.0 e-h | 2.9 k-m | 35.7 b   | 43.2 o   | 7.3 l     |
| Heugmi (Bl)             | 11.0 d-g | 4.1 bc  | 24.0 e-h | 53.6 h-k | 7.4 k     |
| Heugsung (Bl)           | 11.9 c   | 3.1 i-k | 29.0 c   | 48.1 m   | 8.0 g     |
| Ilpumgeomjeong2 (Bl)    | 9.7 p    | 2.6 n   | 28.7 c   | 49.4 lm  | 9.6 b     |
| Ilpumgeomjeongkong (Bl) | 10.3 m-o | 3.9 bc  | 34.3 b   | 46.0 n   | 5.6 r     |
| Jungmo3009 (Bl)         | 10.8 g-j | 3.3 e-i | 19.7 lm  | 55.8 d-f | 10.5 a    |
| Jungmo3011 (Bl)         | 9.8 p    | 3.5 de  | 22.7 g-j | 56.5 cd  | 7.6 ij    |
| Seonheukkong (Bl)       | 10.1 o   | 2.8 l-n | 38.8 a   | 42.2 o   | 6.1 p     |
| Seoritae (Bl)           | 10.7 i-k | 3.4 d-h | 26.1 d   | 52.2 k   | 7.6 hi    |
| Socheong (Bl)           | 11.0 d-f | 2.8 mn  | 19.2 lm  | 57.5 a-c | 9.5 c     |
| Socheong2 (Bl)          | 10.4 mn  | 3.4 d-h | 18.5 mn  | 58.7a    | 9.1 d     |
| Socheongja (Bl)         | 11.7 c   | 3.8 c   | 21.9 h-k | 54.1 g-j | 8.5 f     |
| Taecheong (Bl)          | 11.2 d   | 3.2 f-i | 20.8 j-l | 57.6 a-c | 7.2 l     |
| Tawonkong (Bl)          | 11.2 de  | 4.1 ab  | 19.7 lm  | 57.0 b-d | 8.0 g     |
| Wonheug (Bl)            | 12.0 c   | 4.3 a   | 16.1 o   | 57.2 a-d | 10.5 a    |
| Jinyul (Br)             | 10.4 lm  | 3.0 j-m | 34.7 b   | 45.7 n   | 6.3 o     |
| Chungdu1 (Gr)           | 10.9 f-i | 3.4 d-g | 24.0 e-g | 52.9 i-k | 8.7 e     |
| Jungmo3005 (Gr)         | 10.5 k-m | 3.1 i-l | 22.6 g-k | 56.2 c-e | 7.7 h     |
| LSD (5%)                | 0.25     | 0.25    | 2.09     | 1.65     | 0.12      |

Bl, Br, and Gr, in the parentheses, after the name of genotypes indicate their seed coat color black, brown, and green, respectively. Mean values followed by different letters in the same column indicate significantly different at  $p < 0.05$  ( $n = 2$ ).

**Supplementary Table S4.** Free sugar concentration (mg/g) in the seeds of 29 soybean genotypes.

| Genotype                | Stachyose | Raffinose | Sucrose | Glucose | Galactose | Fructose |
|-------------------------|-----------|-----------|---------|---------|-----------|----------|
| Cheongja2 (Bl)          | 21.5 gh   | 7.5 i     | 49.3 de | 4.2 g   | 1.9 e-i   | 1.7 bc   |
| Cheongja3 (Bl)          | 18.7 mn   | 8.0 de    | 43.9 i  | 4.5 f   | 2.1 b-e   | 1.5 c-e  |
| Cheongja4 (Bl)          | 19.1 lm   | 7.9 fg    | 51.0 c  | 5.4 b   | 2.1 b-e   | 1.7 bc   |
| Cheongja5 (Bl)          | 20.5 jk   | 6.7 lm    | 45.2 g  | 4.2 gh  | 2.2 bc    | 1.6 cd   |
| Cheongjakong (Bl)       | 23.7 d    | 9.1 b     | 50.9 c  | 4.0 i   | 2.4 a     | 1.4 de   |
| Cheongyeob1 (Bl)        | 22.0 fg   | 6.9 kl    | 45.0 gh | 4.6 f   | 1.5 jk    | 1.3 d-f  |
| Daeheug (Bl)            | 20.3 k    | 6.0 o     | 36.9 o  | 6.0 a   | 1.4 k     | 2.7 a    |
| Geomjeongkong1 (Bl)     | 26.5 b    | 6.4 n     | 53.1 b  | 3.3 l   | 1.8 hi    | 1.2 ef   |
| Geomjeongkong2 (Bl)     | 20.3 k    | 7.9 ef    | 46.9 f  | 4.8 e   | 1.9 f-i   | 0.8 gh   |
| Geomjeongkong3 (Bl)     | 21.2 hi   | 7.8 f-h   | 49.6 d  | 4.9 de  | 2.2 bc    | 1.3 d-f  |
| Geomjeongkong4 (Bl)     | 21.0 ij   | 8.2 cd    | 47.1 f  | 4.0 i   | 2.1 b-d   | 1.0 fg   |
| Geomjeongkong5 (Bl)     | 17.9 o    | 6.9 k     | 43.7 ij | 5.1 cd  | 1.7 ij    | 0.9 gh   |
| Heugmi (Bl)             | 24.4 c    | 5.3 p     | 38.5 n  | 3.0 n   | 2.1 b-e   | 1.3 d-f  |
| Heugsung (Bl)           | 21.2 hi   | 7.9 ef    | 48.5 e  | 3.9 ij  | 2.1 b-f   | 2.0 b    |
| Ilpumgeomjeong2 (Bl)    | 28.2 a    | 7.7 gh    | 54.6 a  | 4.0 hi  | 2.1 b-e   | 1.9 b    |
| Ilpumgeomjeongkong (Bl) | 22.2 f    | 6.3 n     | 40.1 m  | 3.4 kl  | 1.8 g-i   | ND       |
| Jungmo3009 (Bl)         | 22.7 e    | 7.5 i     | 52.5 b  | 4.6 f   | 1.7 i     | 0.8 gh   |
| Jungmo3011 (Bl)         | 19.4 l    | 9.3 a     | 44.1 hi | 4.3 g   | 2.0 d-h   | ND       |
| Seonheukkong (Bl)       | 27.7 a    | 7.0 k     | 35.9 p  | 2.9 n   | 2.0 d-h   | ND       |
| Seoritae (Bl)           | 22.1 f    | 7.2 j     | 45.2 g  | 4.2 g   | 2.0 d-h   | 1.2 ef   |
| Socheong (Bl)           | 24.1 cd   | 6.7 m     | 42.7 jk | 3.8 j   | 2.0 d-h   | 0.8 gh   |
| Socheong2 (Bl)          | 26.7 b    | 7.7 h     | 30.7 r  | 3.1 m   | 2.0 c-g   | ND       |
| Socheongja (Bl)         | 21.1 hi   | 7.7 h     | 38.3 n  | 5.0 de  | 2.2 b     | 1.2 ef   |
| Taecheong (Bl)          | 18.3 no   | 9.3 a     | 47.3 f  | 5.2 c   | 2.5 a     | 1.5 c-e  |
| Tawonkong (Bl)          | 22.1 f    | 6.6 m     | 28.8 s  | 3.5 k   | 2.1 b-f   | 0.7h     |
| Wonheug (Bl)            | 22.3 ef   | 8.3 c     | 31.7 q  | 4.0 hi  | 1.7 ij    | ND       |
| Jinyul (Br)             | 26.9 b    | 8.2 c     | 41.8 kl | 2.9 n   | 2.2 b-d   | 0.8 gh   |
| Chungdu1 (Gr)           | 24.1 cd   | 7.56 i    | 41.0 lm | 3.9 ij  | 1.8 g-i   | 0.9 gh   |
| Jungmo3005 (Gr)         | 21.0 ij   | 7.3 ij    | 40.7 m  | 3.3 l   | 1.9 f-i   | ND       |
| LSD (5%)                | 0.47      | 0.17      | 0.96    | 0.15    | 0.21      | 0.27     |

Bl, Br, and Gr, in the parentheses, after the name of genotypes indicate their seed coat color black, brown, and green, respectively. Mean values followed by different letters in the same column indicate significantly different at  $p < 0.05$  ( $n = 3$ ). ND: non-detectable.



**Supplementary Table S5.** Isoflavones content (µg/g) in the seeds of 29 soybean genotypes.

| Genotype                | Di        | Gly      | Gi        | Mdi       | Mgly      | Mgi        | AcDi     | AcGly   | De        | Gle      | AcGi    | Ge       |
|-------------------------|-----------|----------|-----------|-----------|-----------|------------|----------|---------|-----------|----------|---------|----------|
| Cheongja2 (Bl)          | 120.3 c-e | 48.2 b-d | 211.6 a-c | 693.6 d-g | 92.0 gh   | 1006.4 c-f | 24.3 b-d | ND      | 111.6 b-g | 17.9 d-h | 6.4 c-f | 96.5 a-c |
| Cheongja3 (Bl)          | 70.1 g-i  | 15.8 kl  | 112.4 i-k | 595.9 f-h | 50.7 mn   | 900.0 f-h  | ND       | 7.4 c-e | 50.8 g-k  | 10.0 gh  | ND      | 55.5 f-k |
| Cheongja4 (Bl)          | 81.6 f-h  | 32.4 ef  | 132.4 g-j | 619.9 f-h | 71.6 i-l  | 810.3 h-j  | ND       | ND      | 44.4 h-k  | 23.5 c-g | ND      | 50.3 g-k |
| Cheongja5 (Bl)          | 192.2 a   | 34.9 e   | 207.6 a-d | 1282.5 a  | 59.2 k-m  | 1138.3 a-c | ND       | ND      | 138.3 bc  | 12.3 f-h | ND      | 74.9 b-i |
| Cheongjakong (Bl)       | 96.9 c-g  | 19.7 i-k | 143.6 g-j | 593.8 f-h | 61.4 j-m  | 866.8 f-i  | 22.4 de  | 5.9 e-h | 82.3 c-i  | 11.4 f-h | 5.7 d-g | 72.5 b-i |
| Cheongyeob1 (Bl)        | 73.4 g-i  | 20.4 h-k | 157.8 e-g | 393.7 j   | 58.1 k-m  | 779.0 h-j  | 23.6 b-d | 6.4 d-g | 41.8 h-k  | 12.4 f-h | 5.5 d-h | 58.5 e-k |
| Daeheug (Bl)            | 85.9 fg   | 31.1 ef  | 146.6 g-j | 514.0 h-j | 97.6 fg   | 714.4 i-k  | 22.8 c-e | 3.5 g-j | 62.4 e-i  | 15.5 f-h | 6.2 d-f | 59.8 d-k |
| Geomjeongkong1 (Bl)     | 46.0 i-k  | 17.6 j-l | 50.5 l    | 423.9 ij  | 77.6 h-j  | 446.9 n    | 23.8 b-d | 3.3 h-j | 29.1 h-k  | 13.4 f-h | 12.7 b  | 34.7 j-l |
| Geomjeongkong2 (Bl)     | 99.2 c-g  | 23.2 g-j | 156.6 e-h | 734.7 d-f | 83.2 g-i  | 1163.2 ab  | 22.8 c-e | 8.8 cd  | 75.8 d-i  | 16.7 e-h | 6.9 c-f | 78.3 b-g |
| Geomjeongkong3 (Bl)     | 88.4 e-g  | 42.6 d   | 107.9 jk  | 617.9 f-h | 134.3 bc  | 774.6 h-j  | 20.6 e   | ND      | 87.5 c-h  | 39.6 b   | 3.7 f-i | 65.6 d-j |
| Geomjeongkong4 (Bl)     | 156.9 b   | 29.8 e-g | 165.0 d-g | 1058.4 b  | 115.9 de  | 1059.3 b-d | 23.3 b-d | 2.7 ij  | 154.3 b   | 23.6 c-g | 4.2 e-i | 83.2 b-f |
| Geomjeongkong5 (Bl)     | 82.0 f-h  | 12.2 l   | 128.5 g-j | 500.2 h-j | 49.6 mn   | 744.5 i-k  | 24.4 b-d | 13.5 b  | 85.9 c-h  | 18.0 d-h | 9.8 bc  | 72.6 b-i |
| Heugmi (Bl)             | 96.6 c-g  | 44.5 cd  | 113.8 h-k | 554.4 g-i | 72.8 i-k  | 605.0 k-m  | 22.9 c-e | ND      | 87.1 c-h  | 23.8 c-g | 2.4 g-i | 58.6 e-k |
| Heugsung (Bl)           | 98.9 c-g  | 20.4 h-k | 113.1 j-i | 594.2 f-h | 65.8 j-m  | 661.3 j-l  | 22.5 de  | 1.9 j   | 55.5 f-j  | 15.2 f-h | 3.7 f-i | 50.1 g-k |
| Ilpumgeomjeong2 (Bl)    | 97.5 c-g  | 26.5 f-i | 195.9 b-e | 673.0 e-g | 76.2 h-j  | 1252.0 a   | 24.0 b-d | ND      | 112.3 b-f | 36.1 bc  | 8.5 cd  | 121.2 a  |
| Ilpumgeomjeongkong (Bl) | 122.1 cd  | 34.6 e   | 133.6 g-j | 917.9 bc  | 130.7 b-d | 901.7 e-h  | 25.2 a-c | 4.6 e-j | 137.0 bc  | 32.6 b-d | 8.3 cd  | 78.1 b-h |
| Jungmo3009 (Bl)         | 156.2 b   | 31.7 ef  | 247.5 a   | 914.3 bc  | 75.7 h-j  | 1246.2 a   | 25.6 ab  | 5.7 e-i | 125.9 b-d | 18.7 d-h | 8.4 cd  | 99.6 ab  |
| Jungmo3011 (Bl)         | 49.7 h-k  | 16.5 j-l | 77.0 kl   | 371.2 jk  | 31.6 o    | 454.7 mn   | ND       | 4.2 f-j | 1.3 jk    | ND       | ND      | 19.5 l   |
| Seonheukkong (Bl)       | 27.7 k    | 16.9 j-l | 75.9 kl   | 211.7 l   | 77.0 h-j  | 517.8 l-n  | ND       | 23.1 a  | 0.3 jk    | 15.2 f-h | 2.2 hi  | 44.9 i-l |
| Seoritae (Bl)           | 110.1 c-f | 47.9 b-d | 160.1 e-g | 731.8 d-f | 112.3 ef  | 822.0 g-i  | ND       | ND      | 42.3 h-k  | 21.9 c-h | ND      | 36.7 j-l |
| Socheong (Bl)           | 197.8 a   | 63.8 a   | 151.5 f-i | 1404.5 a  | 132.5 bc  | 1055.6 b-e | 27.2 a   | ND      | 253.6 a   | 31.4 b-e | 6.2 d-f | 90.5 b-d |
| Socheong2 (Bl)          | 94.0 d-g  | 54.8 b   | 168.7 c-g | 828.4 cd  | 212.4 a   | 1203.8 ab  | ND       | 4.8 e-j | 52.2 f-k  | 63.1 a   | ND      | 72.8 b-i |
| Socheongja (Bl)         | 96.5 c-g  | 43.0 d   | 132.8 g-j | 726.2 d-f | 120.3 c-e | 855.3 f-i  | ND       | 9.4 c   | 55.8 f-j  | 23.3 c-g | ND      | 54.2 f-k |
| Taecheong (Bl)          | 34.6 k    | 21.3 h-k | 51.5 l    | 248.8 kl  | 41.2 no   | 287.3 o    | ND       | 7.0 c-f | ND        | 7.6 h    | ND      | 18.9 l   |
| Tawonkong (Bl)          | 36.4 jk   | 32.8 ef  | 78.8 kl   | 249.2 kl  | 54.7 mn   | 469.0 mn   | ND       | ND      | ND        | 18.9 d-h | 6.8 c-f | 31.2 kl  |
| Wonheug (Bl)            | 68.1 g-j  | 47.5 cd  | 136.6 g-j | 438.3 ij  | 121.8 c-e | 858.4 f-i  | ND       | ND      | 22.5 i-k  | 64.7 a   | 20.4 a  | 57.7 e-k |
| Jinyul (Br)             | 32.2 k    | 44.0 cd  | 70.8 kl   | 226.4 l   | 108.3 ef  | 438.3 no   | ND       | ND      | ND        | 24.1 c-g | 1.5 i   | 46.2 h-l |
| Chungdul (Gr)           | 158.0 b   | 50.9 bc  | 216.4 ab  | 808.7 c-e | 144.6 b   | 1008.9 c-f | 23.7 b-d | 5.3 e-i | 117.5 b-e | 32.6 b-d | 6.8 c-f | 74.2 b-i |
| Jungmo3005 (Gr)         | 127.6 bc  | 27.4 f-h | 192.9 b-f | 680.2 e-g | 55.3 l-n  | 967.6 d-g  | 25.5 ab  | ND      | 122.7 b-e | 26.6 b-f | 7.2 c-e | 87.8 b-e |
| LSD (5%)                | 33.41     | 7.14     | 43.45     | 144.47    | 16.30     | 154.01     | 2.50     | 2.58    | 51.17     | 12.83    | 3.46    | 26.10    |

Di: daidzin, Gly: glycitin, Gi: genistin, Mdi: malonyldaidzin, Mgly: malonylglycitin, Mgi: malonylgenistin, AcDi: acetyldaidzin, AcGly: acetylglycitin, De: daidzein, Gle: glycitein, AcGi: acetylgenistin, and Ge: genistein. Bl, Br, and Gr, in the parentheses, after the name of genotypes indicate their seed coat color black, brown, and green, respectively. ND: non-detectable. Mean values followed by different letters in the same column indicate significantly different at  $p < 0.05$  ( $n = 3$ ).

**Supplementary Table S6.** Anthocyanin content ( $\mu\text{g/g}$  seed coat) in the seeds of 29 soybean genotypes.

| Genotype                | Dp3glc     | Cy3gal    | Cy3glc      | Pt3glc   | Pg3glc   | Pn3glc    |
|-------------------------|------------|-----------|-------------|----------|----------|-----------|
| Cheongja2 (Bl)          | 3015.8 a   | 180.7 d-g | 12957.0 c-g | 1244.6 a | 216.5 cd | 338.8 f-i |
| Cheongja3 (Bl)          | 1540.0 e-g | 173.8 e-g | 9044.0 i-k  | 733.9 b  | 335.7 c  | 337.1 f-i |
| Cheongja4 (Bl)          | 1185.1 fg  | 178.8 e-g | 10080.0 h-j | 640.4 bc | 207.2 cd | 331.7 g-i |
| Cheongja5 (Bl)          | ND         | 258.2 ab  | 16483.0 ab  | 182.2 d  | 213.5 cd | 647.5 a   |
| Cheongjakong (Bl)       | 1998.6 c-e | 163.1 fg  | 10470.0 g-j | 551.1 bc | 163.2 d  | 301.7 hi  |
| Cheongyeob1 (Bl)        | ND         | 185.6 c-f | 13031.0 c-g | 179.2 d  | 131.9 d  | 368.9 d-g |
| Daeheug (Bl)            | 2616.5 ab  | 191.9 c-f | 12867.0 c-h | 684.4 b  | 152.6 d  | 317.3 g-i |
| Geomjeongkong1 (Bl)     | ND         | 114.2 h   | 3318.0 n    | ND       | 144.2 d  | 307.3 hi  |
| Geomjeongkong2 (Bl)     | 2641.4 ab  | 273.1 a   | 17414.0 a   | 1001.3 a | 161.8 d  | 364.3 d-g |
| Geomjeongkong3 (Bl)     | 3145.1 a   | 189.6 c-f | 13404.0 c-f | 566.1 bc | 132.0 d  | 295.5 hi  |
| Geomjeongkong4 (Bl)     | 1691.3 d-g | 181.7 d-f | 10619.0 f-j | 571.0 bc | 116.9 d  | 292.5 i   |
| Geomjeongkong5 (Bl)     | 2436.9 bc  | 145.3 f-h | 5396.0 l-n  | 999.6 a  | 527.3 b  | 289.6 i   |
| Heugmi (Bl)             | 1784.7 d-f | 155.4 f-h | 8199.0 j-l  | 612.5 bc | 146.3 d  | 297.7 hi  |
| Heugsung (Bl)           | 1661.9 d-g | 132.8 gh  | 6210.0 k-m  | 1006.0 a | 805.9 a  | 326.9 g-i |
| Ilpumgeomjeong2 (Bl)    | 2767.1 ab  | 166.2 e-g | 11527.0 e-i | 707.5 b  | 130.9 d  | 294.0 hi  |
| Ilpumgeomjeongkong (Bl) | 2214.6 b-d | 152.9 f-h | 10527.0 g-j | 595.1 bc | 141.6 d  | 306.4 hi  |
| Jungmo3009 (Bl)         | ND         | 213.7 b-e | 15404.0 a-c | 186.0 d  | 472.6 b  | 501.6 b   |
| Jungmo3011 (Bl)         | 1121.8 g   | 187.2 c-f | 12523.0 d-h | 425.4 cd | 162.9 d  | 317.6 g-i |
| Seonheukkong (Bl)       | ND         | 173.0 e-g | 10464.0 g-j | 184.5 d  | 158.5 d  | 390.4 c-e |
| Seoritae (Bl)           | 1209.5 fg  | 168.5 e-g | 4542.0 mn   | 423.3 cd | ND       | 317.6 g-i |
| Socheong (Bl)           | ND         | 231.2 a-c | 13898.0 b-e | ND       | ND       | 472.4 b   |
| Socheong2 (Bl)          | ND         | 242.6 ab  | 15257.0 a-d | ND       | 165.5 d  | 413.5 cd  |
| Socheongja (Bl)         | 170.2 h    | 227.1 b-d | 14305.0 b-e | 182.0 d  | 131.9 d  | 420.8 c   |
| Taecheong (Bl)          | 1573.8 e-g | 193.2 c-f | 13141.0 c-g | 407.5 cd | 133.9 d  | 346.9 e-h |
| Tawonkong (Bl)          | 1427.5 e-g | 132.5 gh  | 3063.0 n    | 1136.0 a | 164.3 d  | 384.5 c-f |
| Wonheug (Bl)            | 1594.8 e-g | 151.5 f-h | 6436.0 k-m  | 707.4 b  | ND       | 333.8 f-i |
| Jinyul (Br)             | ND         | ND        | ND          | ND       | ND       | ND        |
| Chungdu1 (Gr)           | ND         | ND        | ND          | ND       | ND       | ND        |
| Jungmo3005 (Gr)         | ND         | ND        | ND          | ND       | ND       | ND        |
| LSD (5%)                | 517.50     | 40.07     | 2845.50     | 222.60   | 136.50   | 44.63     |

Dp3glc: delphinidin-3-glucoside, Cy3gal: cyanidin-3-galactoside, Cy3glc: cyanidin-3-glucoside, Pt3glc: petunidin-3-glucoside, Pg3glc: pelargonidin-3-glucoside, Pn3glc: peonidin-3-glucoside. Bl, Br, and Gr, in the parentheses, after the name of genotypes indicate their seed coat color black, brown, and green, respectively. ND: non-detectable. Mean values followed by different letters in the same column indicate significantly different at  $p < 0.05$  ( $n = 3$ ).
